# Supplementary material
Source: publisher site journal article supplement (https://www.dovepress.com/article/325901)
Supplement: Supplementary file 1 [file get_supplementary_file.php]

**Supplementary data 1. Figure S1: Size distribution and  $\zeta$  potential (ZP) curves of formulation F2. (A) Empty-NISV. (B) Mel-loaded NISV. The number of particle size on each peak represent the average size of 3 batches measurement.**

**A**

## Formulation F2-Empty-NISV

### Results

|                                | Size (d.n...         | % Intensity: | St Dev (d.n... |
|--------------------------------|----------------------|--------------|----------------|
| <b>Z-Average (d.nm):</b> 118.1 | <b>Peak 1:</b> 134.3 | 94.3         | 60.11          |
| <b>Pdl:</b> 0.313              | <b>Peak 2:</b> 4724  | 5.7          | 772.1          |
| <b>Intercept:</b> 0.906        | <b>Peak 3:</b> 0.000 | 0.0          | 0.000          |

**Result quality** Good

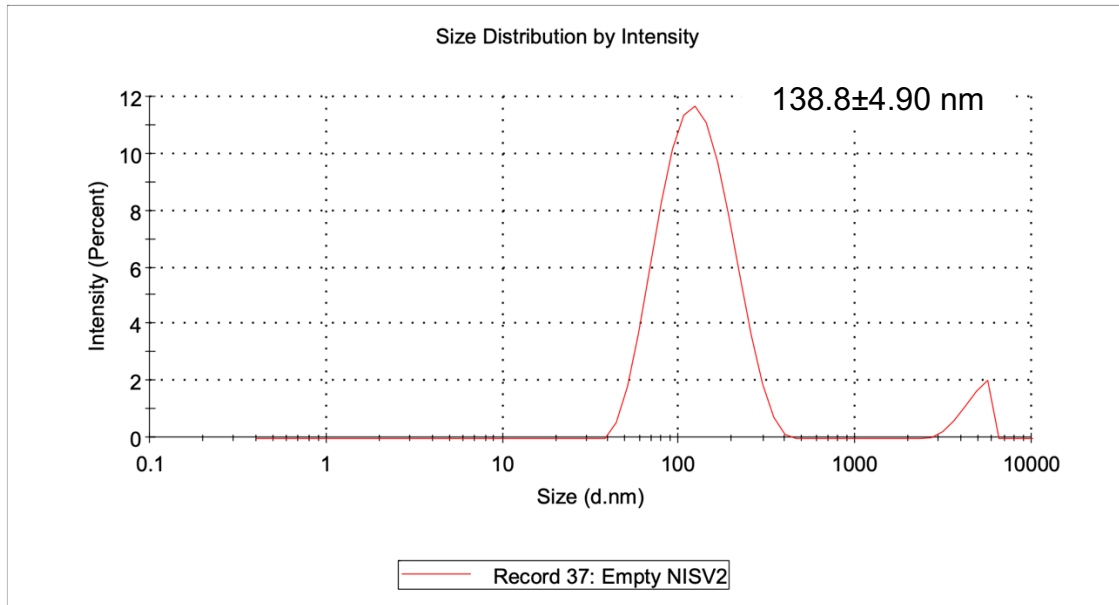

### Results

|                                   | Mean (mV)            | Area (%) | St Dev (mV) |
|-----------------------------------|----------------------|----------|-------------|
| <b>Zeta Potential (mV):</b> -8.91 | <b>Peak 1:</b> -8.91 | 100.0    | 16.3        |
| <b>Zeta Deviation (mV):</b> 16.3  | <b>Peak 2:</b> 0.00  | 0.0      | 0.00        |
| <b>Conductivity (mS/cm):</b> 21.6 | <b>Peak 3:</b> 0.00  | 0.0      | 0.00        |

**Result quality** Good

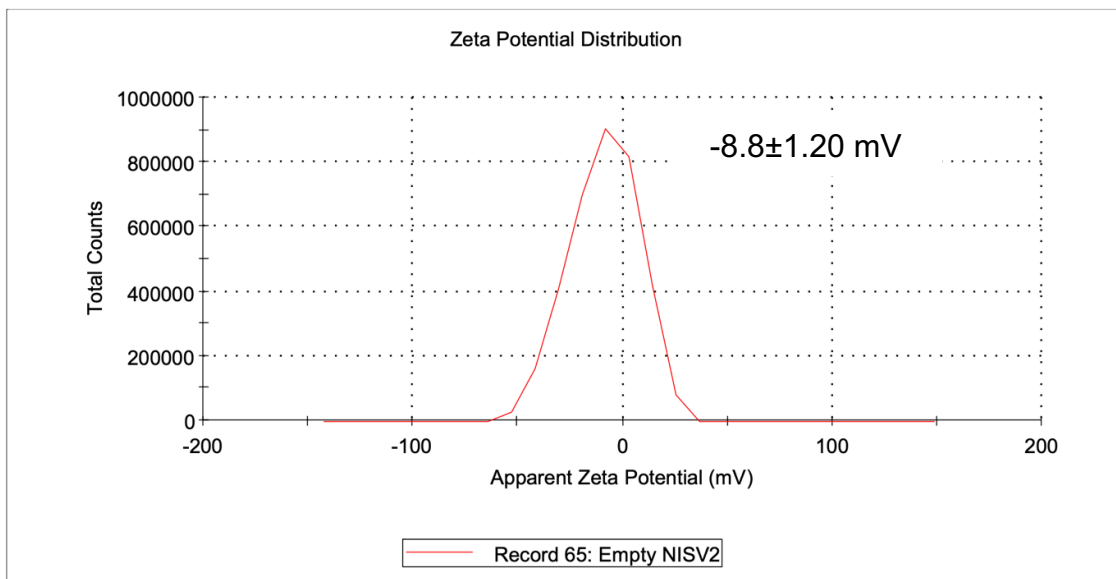

B

## Formulation F2-Mel-Loaded-NISV

### Results

|                                | Size (d.n...         | % Intensity: | St Dev (d.n... |
|--------------------------------|----------------------|--------------|----------------|
| <b>Z-Average (d.nm):</b> 127.0 | <b>Peak 1:</b> 162.7 | 93.0         | 112.3          |
| <b>Pdl:</b> 0.385              | <b>Peak 2:</b> 4579  | 7.0          | 851.1          |
| <b>Intercept:</b> 0.943        | <b>Peak 3:</b> 0.000 | 0.0          | 0.000          |

Result quality **Good**

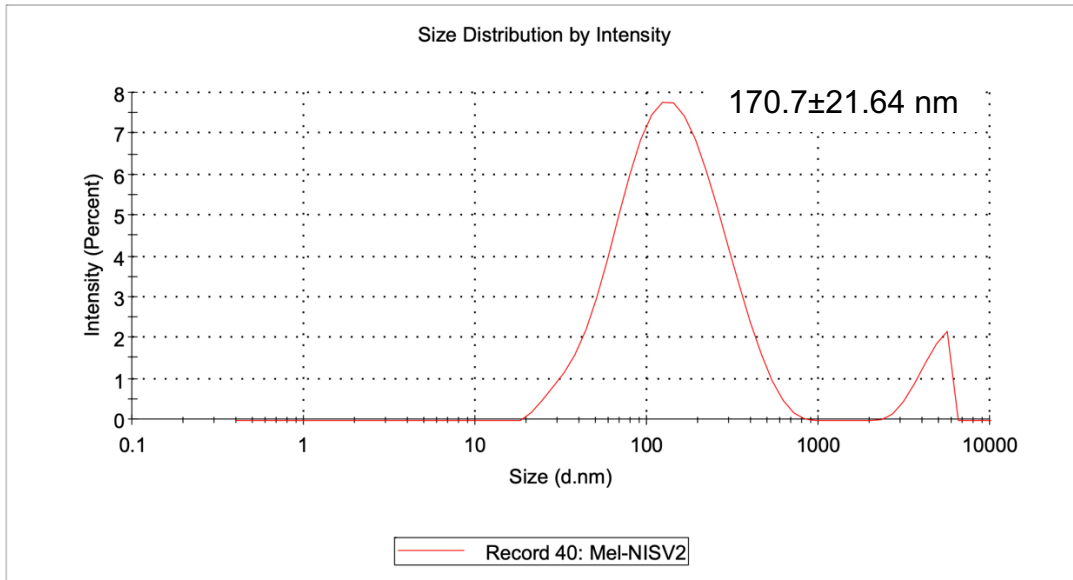

### Results

|                                   | Mean (mV)            | Area (%) | St Dev (mV) |
|-----------------------------------|----------------------|----------|-------------|
| <b>Zeta Potential (mV):</b> -7.55 | <b>Peak 1:</b> -7.55 | 100.0    | 11.5        |
| <b>Zeta Deviation (mV):</b> 11.5  | <b>Peak 2:</b> 0.00  | 0.0      | 0.00        |
| <b>Conductivity (mS/cm):</b> 21.8 | <b>Peak 3:</b> 0.00  | 0.0      | 0.00        |

Result quality **Good**

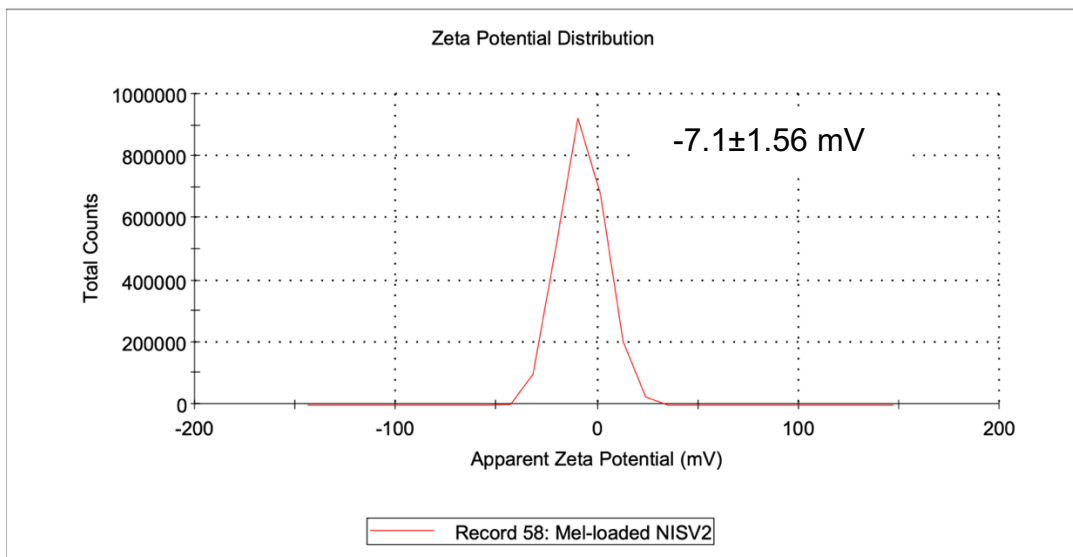

## ProtParam

### User-provided sequence:

          10          20  
GIGAVLKVLT TGLPALISWI KRKRQQG

[References](#) and [documentation](#) are available.

**Number of amino acids:** 27

**Molecular weight:** 2904.54

**Theoretical pI:** 12.02

**Amino acid composition:** [CSV format](#)

|         |   |       |
|---------|---|-------|
| Ala (A) | 2 | 7.4%  |
| Arg (R) | 2 | 7.4%  |
| Asn (N) | 0 | 0.0%  |
| Asp (D) | 0 | 0.0%  |
| Cys (C) | 0 | 0.0%  |
| Gln (Q) | 2 | 7.4%  |
| Glu (E) | 0 | 0.0%  |
| Gly (G) | 4 | 14.8% |
| His (H) | 0 | 0.0%  |
| Ile (I) | 3 | 11.1% |
| Leu (L) | 4 | 14.8% |
| Lys (K) | 3 | 11.1% |
| Met (M) | 0 | 0.0%  |
| Phe (F) | 0 | 0.0%  |
| Pro (P) | 1 | 3.7%  |
| Ser (S) | 1 | 3.7%  |
| Thr (T) | 2 | 7.4%  |
| Trp (W) | 1 | 3.7%  |
| Tyr (Y) | 0 | 0.0%  |
| Val (V) | 2 | 7.4%  |
| Pyl (O) | 0 | 0.0%  |
| Sec (U) | 0 | 0.0%  |

|     |   |      |
|-----|---|------|
| (B) | 0 | 0.0% |
| (Z) | 0 | 0.0% |
| (X) | 0 | 0.0% |

**Total number of negatively charged residues (Asp + Glu):** 0

**Total number of positively charged residues (Arg + Lys):** 5

### Atomic composition:

|          |   |     |
|----------|---|-----|
| Carbon   | C | 133 |
| Hydrogen | H | 231 |
| Nitrogen | N | 39  |
| Oxygen   | O | 33  |
| Sulfur   | S | 0   |

**Formula:** C<sub>133</sub>H<sub>231</sub>N<sub>39</sub>O<sub>33</sub>

**Total number of atoms:** 436

### Extinction coefficients:

Extinction coefficients are in units of M<sup>-1</sup> cm<sup>-1</sup>, at 280 nm measured in water.

|                   |       |
|-------------------|-------|
| Ext. coefficient  | 5500  |
| Abs 0.1% (=1 g/l) | 1.894 |

### Estimated half-life:

The N-terminal of the sequence considered is G (Gly).

The estimated half-life is: 30 hours (mammalian reticulocytes, in vitro).  
>20 hours (yeast, in vivo).  
>10 hours (Escherichia coli, in vivo).

### Instability index:

The instability index (II) is computed to be 43.44  
This classifies the protein as unstable.

**Aliphatic index:** 130.00

**Grand average of hydropathicity (GRAVY):** 0.248
